# Supplementary material for: Multifunctional properties existing in Ln–nitronyl nitroxide single-chain magnets
Source: Royal Society of Chemistry journal article supplement (doi:10.1039/d0tc04266h), 2020-11-18
Supplement: d0tc04266h1.pdf [file d0tc04266h1.pdf]

## Supporting Information

### Multifunctional Properties Existing in Ln-Nitronyl Nitroxide Single-Chain Magnets

Hongdao Li,<sup>\*a</sup> Lu Xi,<sup>b</sup> Pei Jing,<sup>b</sup> Jianke Tang,<sup>a</sup> Qi Wang,<sup>a</sup> Hong Yang,<sup>a</sup> Lijun Zhai,<sup>a</sup> Yulan Niu,<sup>a</sup> Lifeng Ding,<sup>a</sup> Zhengjun Song<sup>\*bc</sup>

<sup>a</sup> *Department of Chemistry and Chemical Engineering, Taiyuan Institute of Technology, Taiyuan 030008, China*

<sup>b</sup> *Department of Chemistry, Key Laboratory of Advanced Energy Materials Chemistry and Tianjin Key Laboratory of Metal and Molecule-based Material Chemistry, College of Chemistry, Nankai University, Tianjin 300071, China*

<sup>c</sup> *School of Pharmaceutical and Materials Engineering, Taizhou University, Taizhou 318000, China*

**Table S1.** Selected bond lengths [Å] and angles [°] for compound **1**.

| <b>1</b>         |            |                  |            |
|------------------|------------|------------------|------------|
| N(1)-C(1)        | 1.314(2)   | C(2)-C(3)        | 1.343(3)   |
| N(1)-C(9)        | 1.361(2)   | C(3)-C(4)        | 1.415(2)   |
| N(2)-O(1)        | 1.2749(17) | C(4)-C(5)        | 1.406(3)   |
| N(2)-C(10)       | 1.3388(18) | C(4)-C(9)        | 1.417(2)   |
| N(2)-C(12)       | 1.496(2)   | C(5)-C(6)        | 1.350(3)   |
| N(3)-O(2)        | 1.2772(16) | C(6)-C(7)        | 1.405(2)   |
| N(3)-C(10)       | 1.3340(19) | C(7)-C(8)        | 1.368(2)   |
| N(3)-C(11)       | 1.5017(18) | C(8)-C(9)        | 1.415(2)   |
| C(1)-C(2)        | 1.407(3)   | C(8)-C(10)       | 1.4679(19) |
| C(1)-N(1)-C(9)   | 116.95(15) | N(1)-C(1)-C(2)   | 124.06(19) |
| O(1)-N(2)-C(10)  | 125.65(13) | C(3)-C(2)-C(1)   | 119.70(17) |
| O(1)-N(2)-C(12)  | 122.64(13) | N(1)-C(9)-C(8)   | 118.73(13) |
| C(10)-N(2)-C(12) | 111.27(12) | N(1)-C(9)-C(4)   | 122.90(14) |
| O(2)-N(3)-C(10)  | 125.18(13) | N(3)-C(10)-N(2)  | 109.85(12) |
| O(2)-N(3)-C(11)  | 122.32(12) | N(3)-C(10)-C(8)  | 124.54(12) |
| C(10)-N(3)-C(11) | 111.71(11) | N(2)-C(12)-C(11) | 100.98(12) |

**Table S2.** Selected bond lengths [Å] and angles [°] for complexes **2** and **3**.

| 2 Tb              |           | 3 Dy               |            |
|-------------------|-----------|--------------------|------------|
| Tb(1)-O(1)        | 2.378(7)  | Dy(1)-O(1)         | 2.361(5)   |
| Tb(1)-O(2)        | 2.333(6)  | Dy(1)-O(2)         | 2.316(5)   |
| Tb(1)-O(3)        | 2.345(6)  | Dy(1)-O(3)         | 2.337(5)   |
| Tb(1)-O(4)        | 2.393(7)  | Dy(1)-O(4)         | 2.362(5)   |
| Tb(1)-O(5)        | 2.392(6)  | Dy(1)-O(5)         | 2.376(5)   |
| Tb(1)-O(6)        | 2.363(6)  | Dy(1)-O(6)         | 2.322(5)   |
| Tb(1)-O(7)        | 2.386(7)  | Dy(1)-O(7)         | 2.335(5)   |
| Tb(1)-O(8)        | 2.358(7)  | Dy(1)-O(8)         | 2.384(5)   |
| Tb(2)-O(9)        | 2.389(7)  | Dy(2)-O(9)         | 2.385(5)   |
| Tb(2)-O(10)       | 2.371(6)  | Dy(2)-O(10)        | 2.353(5)   |
| Tb(2)-O(11)       | 2.350(6)  | Dy(2)-O(11)        | 2.369(5)   |
| Tb(2)-O(12)       | 2.387(7)  | Dy(2)-O(12)        | 2.311(5)   |
| Tb(2)-O(13)       | 2.326(6)  | Dy(2)-O(13)        | 2.341(5)   |
| Tb(2)-O(14)       | 2.368(6)  | Dy(2)-O(14)        | 2.350(5)   |
| Tb(2)-O(15)       | 2.366(6)  | Dy(2)-O(15)        | 2.367(5)   |
| Tb(2)-O(16)       | 2.357(7)  | Dy(2)-O(16)        | 2.323(4)   |
| O(1)-N(2)         | 1.291(10) | N(2)-O(1)          | 1.275(7)   |
| O(9)-N(5)         | 1.287(10) | N(3)-O(2)          | 1.296(7)   |
| N(6)-O(10)#1      | 1.278(9)  | O(10)-N(6)         | 1.278(7)   |
| N(3)-O(2)#2       | 1.291(10) | N(5)-O(9)          | 1.274(7)   |
| O(2)-Tb(1)-O(1)   | 137.3(2)  | O(2)#1-Dy(1)-O(1)  | 137.37(19) |
| O(10)-Tb(2)-O(9)  | 139.8(2)  | O(10)-Dy(2)-O(9)#2 | 139.80(18) |
| O(3)-Tb(1)-O(4)   | 72.2(2)   | O(3)-Dy(1)-O(4)    | 73.62(17)  |
| O(6)-Tb(1)-O(5)   | 72.2(2)   | O(6)-Dy(1)-O(5)    | 72.65(17)  |
| O(8)-Tb(1)-O(7)   | 73.3(2)   | O(7)-Dy(1)-O(8)    | 72.01(17)  |
| O(11)-Tb(2)-O(12) | 72.2(2)   | O(12)-Dy(2)-O(11)  | 72.95(17)  |
| O(13)-Tb(2)-O(14) | 73.3(2)   | O(13)-Dy(2)-O(14)  | 73.56(17)  |
| O(16)-Tb(2)-O(15) | 73.6(2)   | O(16)-Dy(2)-O(15)  | 72.37(17)  |

Symmetry transformations used to generate equivalent atoms: #1 -x, y+1/2, -z+1/2 and #2 -x+1, y+1/2, -z+1/2 for **2**; #1 -x+1, y+1/2, -z+1/2 and #2 -x, y-1/2, -z+1/2 for **3**

**Table S3.** SHAPE analysis for complexes **2** and **3**.

| Complex      | SAPR-8 | TDD-8        | BTPR-8 |
|--------------|--------|--------------|--------|
| <b>2</b> Tb1 | 2.035  | <b>0.390</b> | 1.907  |
| Tb2          | 1.988  | <b>0.265</b> | 2.367  |
| <b>3</b> Dy1 | 2.101  | <b>0.372</b> | 1.924  |
| Dy2          | 2.037  | <b>0.246</b> | 2.401  |

SAPR-8: Square antiprism; TDD-8: Triangular dodecahedron; BTPR-8: Biaugmented trigonal prism

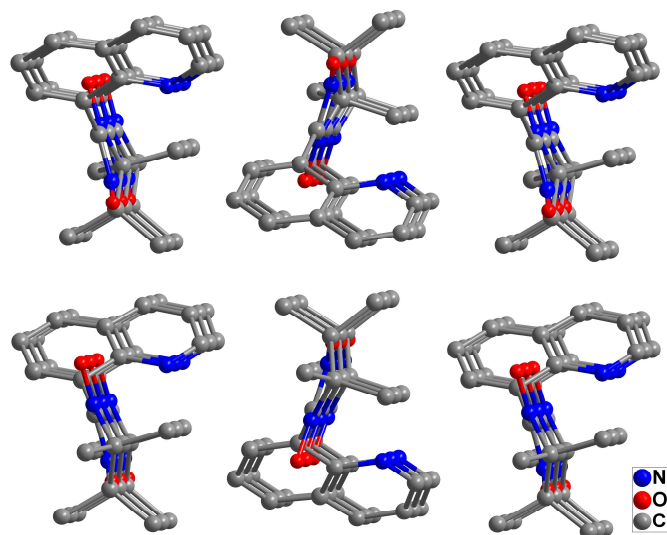

**Figure S1.** Packing diagram of complex **1** and all of the hydrogen atoms are omitted for clarity.

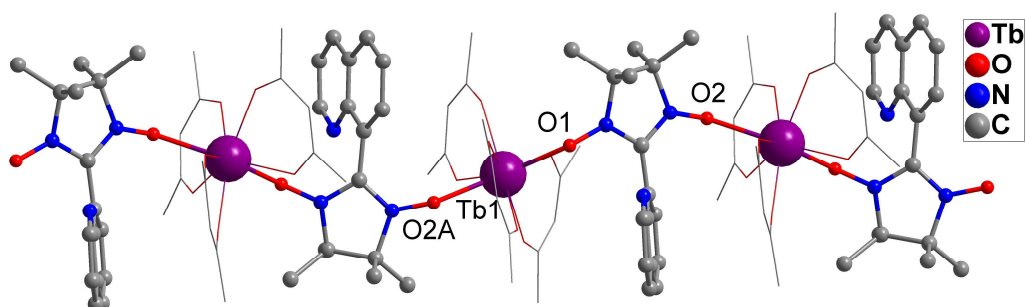

**Figure S2.** Single-crystal X-ray diffraction structure of complex **2**, in which H and F atoms are omitted for clarity.

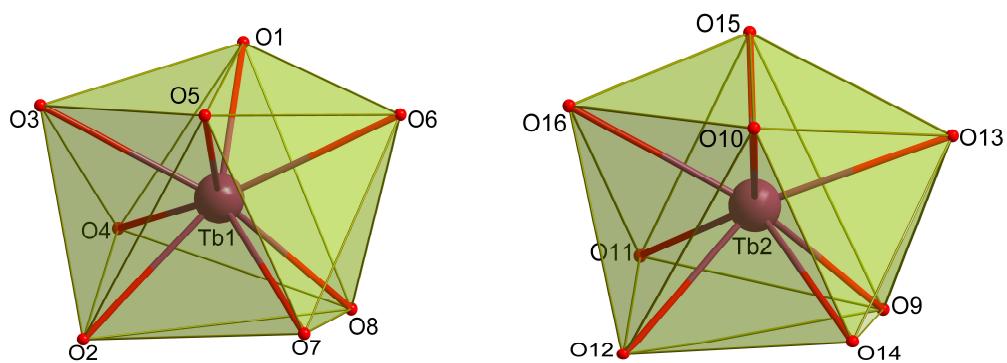

**Figure S3.** The coordination polyhedron of Tb(III) ions in complex **2**.

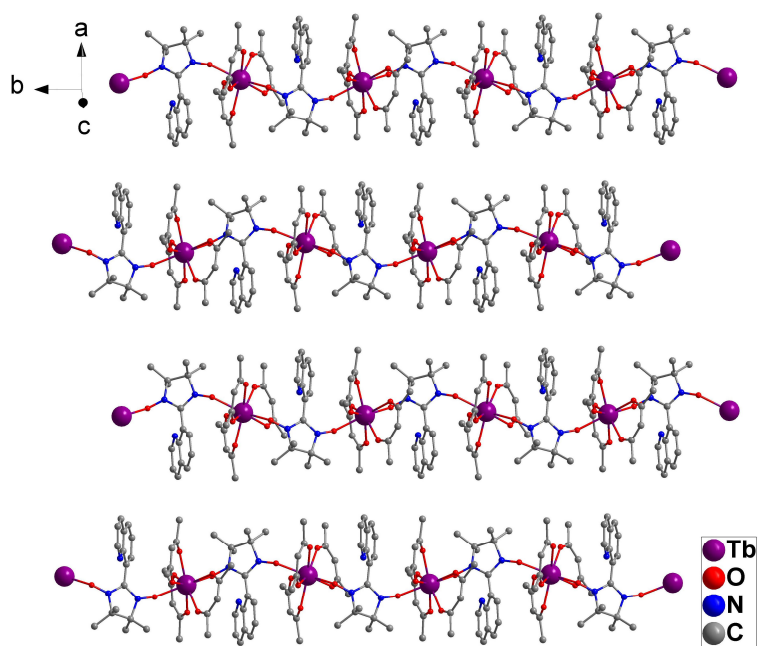

**Figure S4.** Packing diagram of complex 2 and all of the hydrogen and fluorine atoms are omitted for clarity.

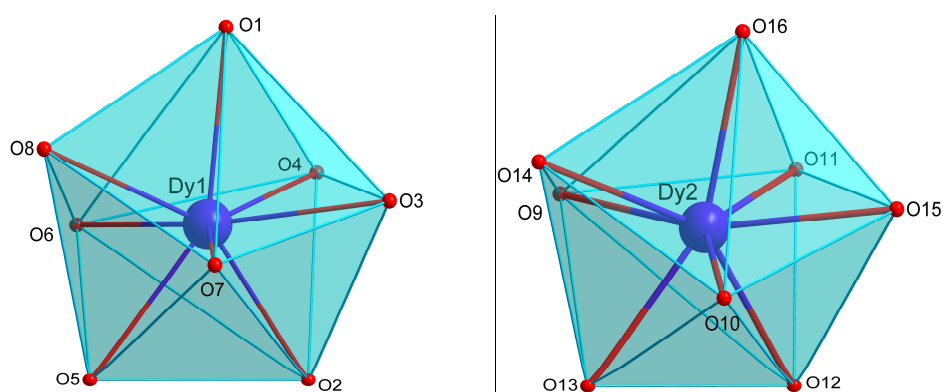

**Figure S5.** The coordination polyhedron of Dy(III) ions in complex 3.

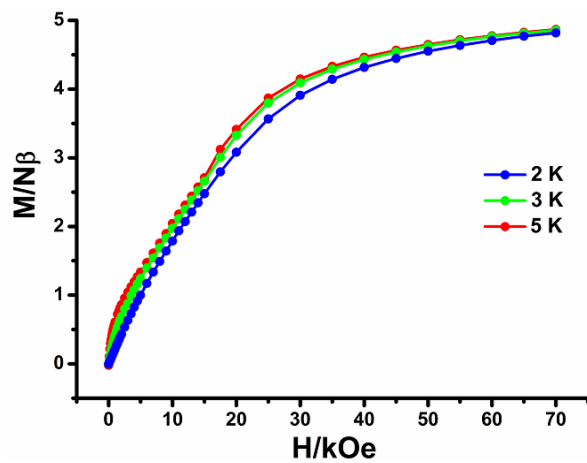

**Figure S6.**  $M$  versus  $H$  plot of complex 2 at 2.0 K.

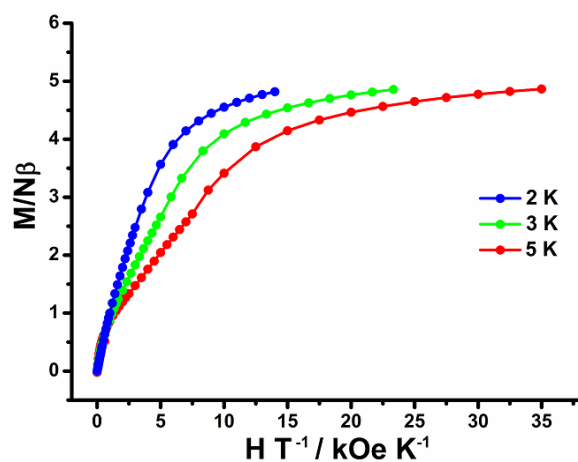

Figure S7. Plots of the reduced magnetization  $M$  versus  $HT^{-1}$  for compound 2.

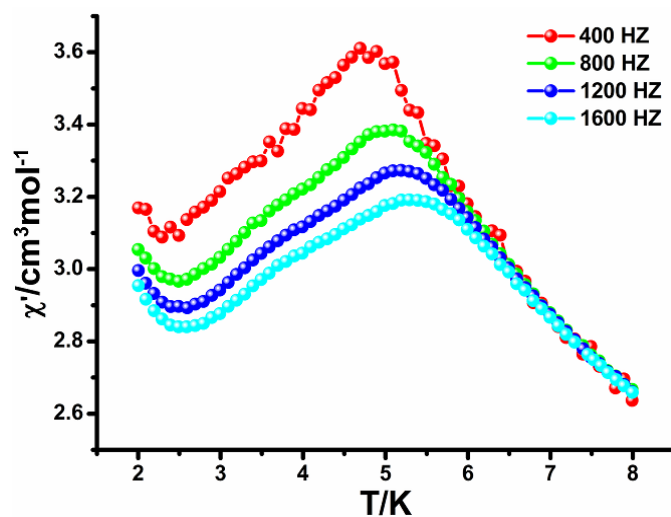

Figure S8. Temperature dependence of  $\chi'$  for 2 in zero dc field with an oscillation of 3 Oe.

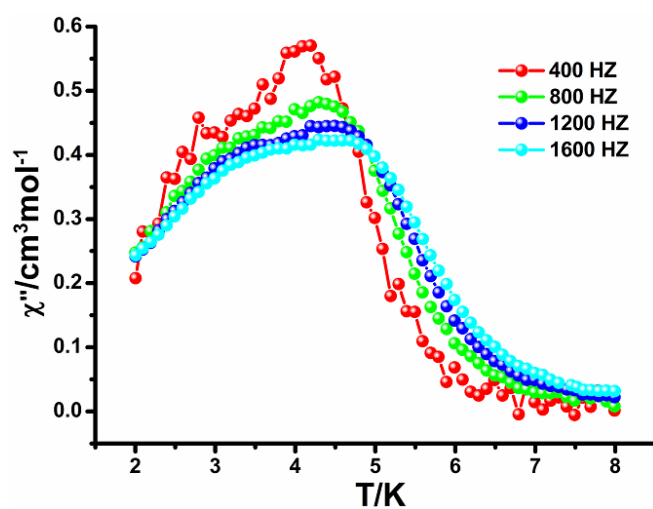

Figure S9. Temperature dependence of  $\chi''$  for 2 in zero dc field with an oscillation of 3 Oe.

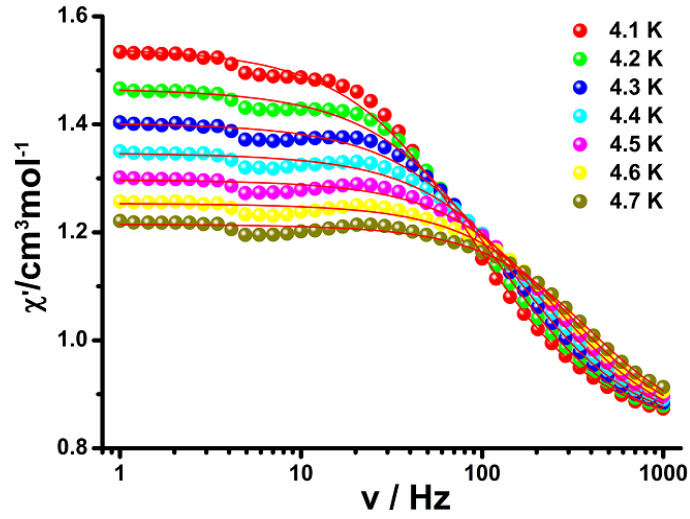

**Figure S10.** Frequency dependence of  $\chi'$  for **2** under zero dc field in the temperature range 4.3-5.0 K. The solid line represents the fitting result.

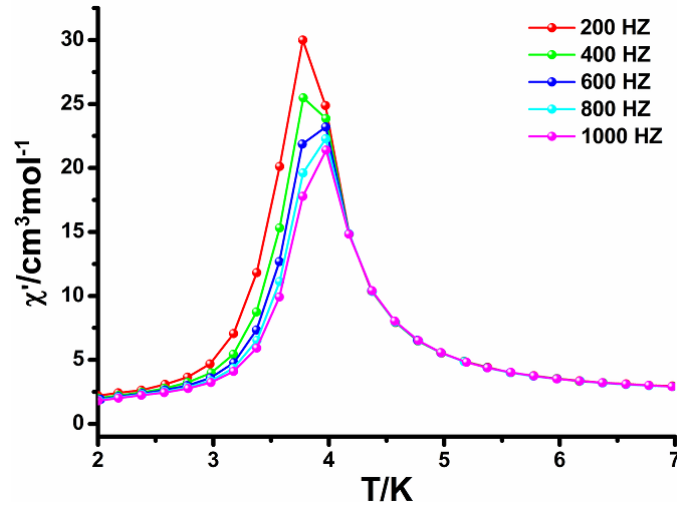

**Figure S11.** Temperature dependence of  $\chi'$  for **3** in zero dc field with an oscillation of 3 Oe.

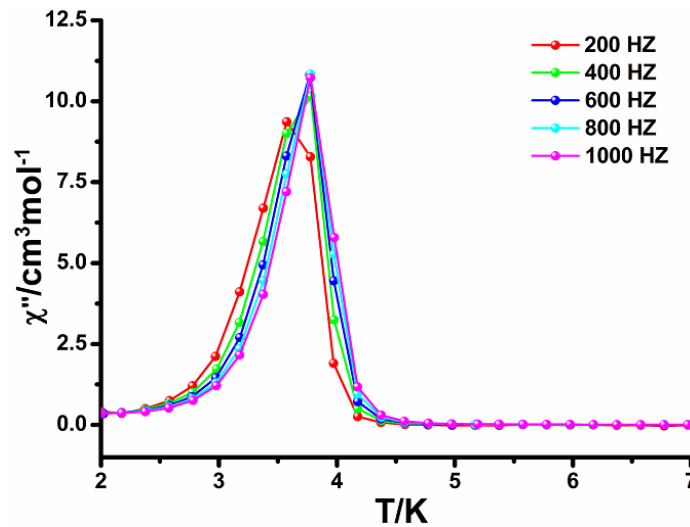

**Figure S12.** Temperature dependence of  $\chi''$  for **3** in zero dc field with an oscillation of 3 Oe.

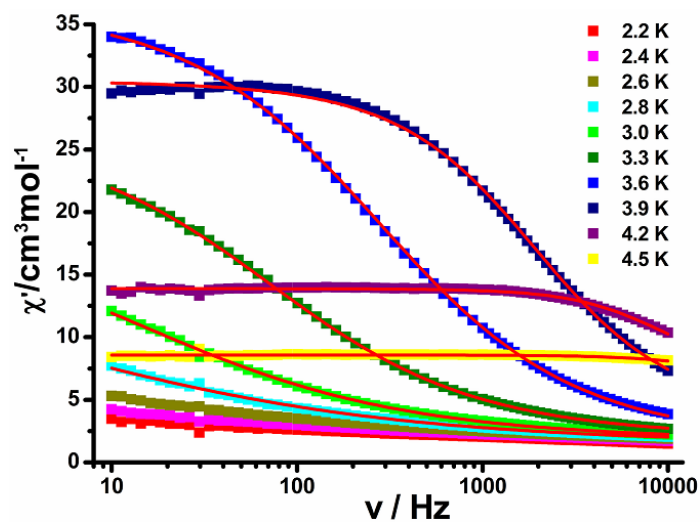

**Figure S13.** Frequency dependence of  $\chi''$  for **3** under zero dc field in the temperature range 2.2 K-4.5 K. The solid line represents the fitting result.

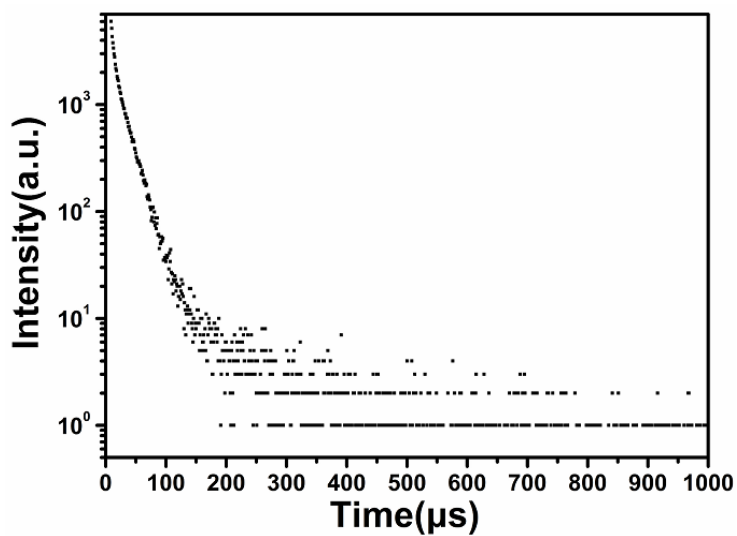

**Figure S14.** Luminescence decay of complex **2**.

**Table S4.** Selected parameters from the fitting result of the Cole-Cole plots for compound **2** under 0 Oe.

| <i>Temp. (K)</i> | $\tau$  | $\alpha$ | <b>residual</b> |
|------------------|---------|----------|-----------------|
| 4.1 K            | 0.0018  | 0.1990   | 3.53E-4         |
| 4.2 K            | 0.0013  | 0.1886   | 1.93E-5         |
| 4.3 K            | 0.00101 | 0.1794   | 1.66E-5         |
| 4.4 K            | 7.88E-4 | 0.1688   | 7.48E-6         |
| 4.5 K            | 6.21E-4 | 0.1580   | 5.27E-6         |
| 4.6 K            | 4.99E-4 | 0.1491   | 4.23E-6         |
| 4.7 K            | 4.05E-4 | 0.1403   | 4.05E-4         |
